# Supplementary material
Source: publisher figshare collection journal article supplement (https://tandf.figshare.com/articles/dataset/_/10095926)
Supplement: Supplementary file 1 [file 1]

| Hits name     | Binding affinity | Drug Score | Interacting residues      | Number of H-bonds | Drug category          |
|---------------|------------------|------------|---------------------------|-------------------|------------------------|
| Morphine      | -7.7             | -57.7      | K345, Y356                | 2                 | Analgesics             |
| Dexketoprofen | -7.5             | 42.8       | R88 (2), Q112, K345, Y356 | 5                 | Anti-Inflammatory      |
| Ketoprofen    | -7.5             | -62.4      | R88 (2), K345, Y356       | 4                 | Antirheumatic Agents   |
| Flurbiprofen  | -7.3             | -27.1      | R88 (2), K345, Y356       | 4                 | Anti-Inflammatory      |
| Zidovudine    | -7.3             | -30        | K345, Y356                | 2                 | Anti-HIV Agents        |
| Loxoprofen    | -7.0             | -33.6      | R88, Q112, K345           | 2                 | Antirheumatic Agents   |
| Imipenem      | -6.4             | -22.5      | Q112,Y356                 | 2                 | Anti-Bacterial Agents, |
| Zaltoprofen   | -6.4             | -42        | R88, Q112, Y356           | 2                 | Anti-Inflammatory      |
| Tolcapone     | -6.2             | 19         | R88,Q112                  | 2                 | Anti-Dyskinesia        |
| Edetic acid   | -5.5             | 5.5        | R88 , Q112, K345          | 3                 | Anti-coagulant         |
| Ref-ligand    | -5.4             | -36.1      | R88 (2),Q112, K345,Y356   | 5                 | LAAO inhibitor         |
